# Supplementary material
Source: ML conference proceedings conference paper supplement (https://proceedings.neurips.cc/paper_files/paper/2013/hash/39461a19e9eddfb385ea76b26521ea48-Abstract.html)
Supplement: Supplementary file [file 39461a19e9eddfb385ea76b26521ea48-Supplemental.zip]

---

# Supplementary Material to 'Prior-free and prior-dependent regret bounds for Thompson Sampling'

---

**Sébastien Bubeck, Che-Yu Liu**

Department of Operations Research and Financial Engineering,  
Princeton University  
sbubeck@princeton.edu, cheliu@princeton.edu

## Proof of Theorem 3

The general structure of the proof is superficially similar to the proof of Theorem 2 but many details are different. Without loss of generality we assume that arm 1 is the optimal arm, that is  $\mu_1 = \mu^*$  and  $\forall i \geq 2, \mu_i = \mu^* - \Delta_i$ . Let  $\hat{\gamma}_{1,s} = \mu_1 - \hat{\mu}_{1,s}$  and  $\hat{\gamma}_{i,s} = \hat{\mu}_{i,s} - \mu_i$  for  $i \geq 2$ . We decompose the proof into four steps.

**Step 1: Rewriting of the ratio  $\frac{p_{i,t}}{p_{1,t}}$ .** Let  $i \geq 2$ , the following rewriting will be useful in the rest of the proof:

$$\begin{aligned}
 \frac{p_t(i)}{p_t(1)} &= \frac{\int_{-\infty}^{\mu_1 - \varepsilon} \exp\left(-\frac{1}{3} \sum_{s=1}^{T_1(t-1)} (X_{1,s} - v)^2 - (X_{1,s} - \mu_1)^2\right) dv}{\int_{-\infty}^{\mu_1 - \varepsilon} \exp\left(-\frac{1}{3} \sum_{s=1}^{T_i(t-1)} (X_{i,s} - v)^2 - (X_{i,s} - \mu_1)^2\right) dv} \\
 &= \frac{\int_{-\infty}^{\mu_1 - \varepsilon} \exp\left(-\frac{T_1(t-1)}{3} (\hat{\mu}_{1,T_1(t-1)} - v)^2 - (\hat{\mu}_{1,T_1(t-1)} - \mu_1)^2\right) dv}{\int_{-\infty}^{\mu_1 - \varepsilon} \exp\left(-\frac{T_i(t-1)}{3} (\hat{\mu}_{i,T_i(t-1)} - v)^2 - (\hat{\mu}_{i,T_i(t-1)} - \mu_1)^2\right) dv} \\
 &= \frac{\int_{-\hat{\gamma}_{1,T_1(t-1)} + \varepsilon}^{+\infty} \exp\left(-\frac{T_1(t-1)}{3} (v^2 - \hat{\gamma}_{1,T_1(t-1)}^2)\right) dv}{\int_{\hat{\gamma}_{i,T_i(t-1)} - \Delta_i + \varepsilon}^{+\infty} \exp\left(-\frac{T_i(t-1)}{3} (v^2 - (\hat{\gamma}_{i,T_i(t-1)} - \Delta_i)^2)\right) dv},
 \end{aligned}$$

where the last step follows by a simple change of variable.

**Step 2: Decomposition of  $R_n$ .** For  $i \geq 2$ . Let  $A_i = \lceil \frac{6}{\Delta_i^2} \log(\frac{e^6 \Delta_i}{\varepsilon}) \rceil$  where  $\lceil x \rceil$  is the smallest integer larger than  $x$ . We decompose the regret  $R_n$  as follows.

$$\begin{aligned}
R_n &= \sum_{i=2}^K \left( \Delta_i + \Delta_i \mathbb{E} \sum_{t=K+1}^n \mathbb{1}\{I_t = i\} \right) \\
&\leq \sum_{i=2}^K \Delta_i \left( A_i + \mathbb{E} \sum_{t=K+1}^n \mathbb{1}\{T_i(t-1) \geq A_i, I_t = i\} \right) \\
&= \sum_{i=2}^K \Delta_i \left( A_i + \mathbb{E} \sum_{t=K+1}^n \mathbb{1}\left\{ \hat{\gamma}_{i, T_i(t-1)} > \frac{\Delta_i}{4}, T_i(t-1) \geq A_i, I_t = i \right\} \right. \\
&\quad \left. + \mathbb{E} \sum_{t=K+1}^n \mathbb{1}\left\{ \hat{\gamma}_{i, T_i(t-1)} \leq \frac{\Delta_i}{4}, T_i(t-1) \geq A_i, I_t = i \right\} \right).
\end{aligned}$$

The first expectation can be bounded by using Hoeffding's inequality.

$$\mathbb{E} \sum_{t=K+1}^n \mathbb{1}\left\{ \hat{\gamma}_{i, T_i(t-1)} > \frac{\Delta_i}{4}, T_i(t-1) \geq A_i, I_t = i \right\} \leq \mathbb{E} \sum_{s=1}^n \mathbb{1}\left\{ \hat{\gamma}_{i, s} > \frac{\Delta_i}{4} \right\} \leq \sum_{s=1}^n \exp\left(-\frac{s \Delta_i^2}{32}\right) \leq \frac{32}{\Delta_i^2}.$$

The second expectation is more difficult to bound from above and the next two steps are dedicated to this task.

**Step 3: Analysis of  $\sum_{t=K+1}^n \mathbb{E} \mathbb{1}\left\{ \hat{\gamma}_{i, T_i(t-1)} \leq \frac{\Delta_i}{4}, T_i(t-1) \geq A_i, I_t = i \right\}$ .** Clearly by definition of the policy one has

$$\begin{aligned}
&\sum_{t=K+1}^n \mathbb{E} \mathbb{1}\left\{ \hat{\gamma}_{i, T_i(t-1)} \leq \frac{\Delta_i}{4}, T_i(t-1) \geq A_i, I_t = i \right\} \\
&= \sum_{t=K+1}^n \mathbb{E} \left[ \frac{p_t(i)}{p_t(1)} \mathbb{1}\left\{ \hat{\gamma}_{i, T_i(t-1)} \leq \frac{\Delta_i}{4}, T_i(t-1) \geq A_i, I_t = 1 \right\} \right].
\end{aligned}$$

We have now to control the term  $\frac{p_t(i)}{p_t(1)}$  on the event  $\{\hat{\gamma}_{i, T_i(t-1)} \leq \frac{\Delta_i}{4}, T_i(t-1) \geq A_i\}$ . The following bounds on the tail of the standard Gaussian distribution will be useful, for any  $x > 0$  one has

$$\frac{1}{x} e^{-\frac{1}{2}x^2} \geq \int_x^{+\infty} e^{-\frac{1}{2}v^2} dv \geq \frac{1}{x} \left(1 - \frac{1}{x^2}\right) e^{-\frac{1}{2}x^2}.$$

Now one has

$$\begin{aligned}
&\int_{\hat{\gamma}_{i, T_i(t-1)} - \Delta_i + \varepsilon}^{+\infty} e^{-\frac{1}{3}T_i(t-1)(v^2 - (\hat{\gamma}_{i, T_i(t-1)} - \Delta_i)^2)} dv \\
&= e^{\frac{1}{3}T_i(t-1)(\hat{\gamma}_{i, T_i(t-1)} - \Delta_i)^2} \int_{\hat{\gamma}_{i, T_i(t-1)} - \Delta_i + \varepsilon}^{+\infty} e^{-\frac{1}{3}T_i(t-1)v^2} dv \\
&\geq e^{\frac{3}{16}T_i(t-1)\Delta_i^2} \int_{\frac{\Delta_i}{4}}^{+\infty} e^{-\frac{1}{3}T_i(t-1)v^2} dv \\
&= e^{\frac{3}{16}T_i(t-1)\Delta_i^2} \cdot \sqrt{\frac{3}{2T_i(t-1)}} \cdot \int_{\frac{\Delta_i}{4} \sqrt{\frac{2T_i(t-1)}{3}}}^{+\infty} e^{-\frac{1}{2}v^2} dv \\
&\geq e^{\frac{3}{16}T_i(t-1)\Delta_i^2} \cdot \frac{6}{\Delta_i T_i(t-1)} \left(1 - \frac{24}{\Delta_i^2 T_i(t-1)}\right) e^{-\frac{1}{48}T_i(t-1)\Delta_i^2} \\
&\geq e^{\frac{1}{6}T_i(t-1)\Delta_i^2} \cdot \frac{2}{\Delta_i T_i(t-1)},
\end{aligned}$$

where the last step follows from

$$T_i(t-1) \geq A_i \geq \frac{6}{\Delta_i^2} \log \left( \frac{e^6 \Delta_i}{\varepsilon} \right) \geq \frac{36}{\Delta_i^2}.$$

Next, using the fact that the function  $x \rightarrow \frac{1}{x} e^{\frac{1}{6} x \Delta_i^2}$  is increasing on  $[\frac{6}{\Delta_i^2}, +\infty)$ , we get

$$\begin{aligned} \left( \int_{\hat{\gamma}_i, T_i(t-1) - \Delta_i + \varepsilon}^{+\infty} e^{-\frac{1}{3} T_i(t-1)(v^2 - (\hat{\gamma}_i, T_i(t-1) - \Delta_i)^2)} dv \right)^{-1} &\leq \left( e^{\frac{1}{6} T_i(t-1) \Delta_i^2} \cdot \frac{2}{\Delta_i T_i(t-1)} \right)^{-1} \\ &\leq e^{-\frac{1}{6} \Delta_i^2 \left( \frac{6}{\Delta_i^2} \log \left( \frac{e^6 \Delta_i}{\varepsilon} \right) \right)} \frac{\Delta_i}{2} \frac{6}{\Delta_i^2} \log \left( \frac{e^6 \Delta_i}{\varepsilon} \right) \\ &= \frac{3}{e^6} \frac{\varepsilon}{\Delta_i^2} \log \left( \frac{e^6 \Delta_i}{\varepsilon} \right). \end{aligned}$$

Plugging into the expression of  $\frac{p_t(i)}{p_t(1)}$ , we obtain

$$\begin{aligned} &\sum_{t=K+1}^n \mathbb{E} \mathbb{1}_{\{\hat{\gamma}_i, T_i(t-1) \leq \frac{\Delta_i}{4}, T_i(t-1) \geq A_i, I_t = i\}} \\ &= \sum_{t=K+1}^n \mathbb{E} \left[ \frac{p_{i,t}}{p_{1,t}} \mathbb{1}_{\{\hat{\gamma}_i, T_i(t-1) \leq \frac{\Delta_i}{4}, T_i(t-1) \geq A_i, I_t = 1\}} \right] \\ &\leq \left( \sum_{t=K+1}^n \mathbb{E} \left[ \int_{-\hat{\gamma}_1, T_1(t-1) + \varepsilon}^{+\infty} e^{-\frac{1}{3} T_1(t-1)(v^2 - \hat{\gamma}_1^2, T_1(t-1))} dv \mathbb{1}_{\{I_t = 1\}} \right] \right) \frac{3}{e^6} \frac{\varepsilon}{\Delta_i^2} \log \left( \frac{e^6 \Delta_i}{\varepsilon} \right). \\ &\leq \left( \sum_{t=1}^{+\infty} \mathbb{E} \left[ \int_{-\hat{\gamma}_1, t + \varepsilon}^{+\infty} e^{-\frac{1}{3} t(v^2 - \hat{\gamma}_1^2, t)} dv \right] \right) \frac{3}{e^6} \frac{\varepsilon}{\Delta_i^2} \log \left( \frac{e^6 \Delta_i}{\varepsilon} \right). \end{aligned}$$

**Step 4: Control of  $\sum_{t=1}^{+\infty} \mathbb{E} \left[ \int_{-\hat{\gamma}_1, t + \varepsilon}^{+\infty} e^{-\frac{1}{3} t(v^2 - \hat{\gamma}_1^2, t)} dv \right]$ .**

First, observe that

$$\begin{aligned} &\sum_{t=1}^{+\infty} \mathbb{E} \left[ \int_{-\hat{\gamma}_1, t + \varepsilon}^{+\infty} e^{-\frac{1}{3} t(v^2 - \hat{\gamma}_1^2, t)} dv \right] \\ &\leq \sum_{t=1}^{+\infty} \mathbb{E} \left[ \int_{-\hat{\gamma}_1, t + \varepsilon}^{+\infty} e^{-\frac{1}{3} t v^2} dv \cdot e^{\frac{1}{3} t \hat{\gamma}_1^2} \mathbb{1}_{\{|\hat{\gamma}_1, t| \leq \frac{\varepsilon}{3}\}} \right] + \sum_{t=1}^{+\infty} \mathbb{E} \left[ \int_{-\hat{\gamma}_1, t + \varepsilon}^{+\infty} e^{-\frac{1}{3} t v^2} dv \cdot e^{\frac{1}{3} t \hat{\gamma}_1^2} \mathbb{1}_{\{|\hat{\gamma}_1, t| \geq \frac{\varepsilon}{3}\}} \right] \\ &\leq \sum_{t=1}^{+\infty} \int_{\frac{2}{3}\varepsilon}^{+\infty} e^{-\frac{1}{3} t v^2} dv \cdot e^{\frac{1}{27} t \varepsilon^2} + \sum_{t=1}^{+\infty} \int_{-\infty}^{+\infty} e^{-\frac{1}{3} t v^2} dv \cdot \mathbb{E} \left[ e^{\frac{1}{3} t \hat{\gamma}_1^2} \mathbb{1}_{\{|\hat{\gamma}_1, t| \geq \frac{\varepsilon}{3}\}} \right]. \end{aligned}$$

The first term is straightforward to compute:

$$\begin{aligned} \sum_{t=1}^{+\infty} \int_{\frac{2}{3}\varepsilon}^{+\infty} e^{-\frac{1}{3} t v^2} dv \cdot e^{\frac{1}{27} t \varepsilon^2} &= \int_{\frac{2}{3}\varepsilon}^{+\infty} \sum_{t=1}^{+\infty} e^{-\frac{1}{3} t(v^2 - \frac{1}{9} \varepsilon^2)} dt \cdot dv \\ &\leq \int_{\frac{2}{3}\varepsilon}^{+\infty} \frac{3}{v^2 - \frac{1}{9} \varepsilon^2} dv \leq \frac{9 \log 3}{2\varepsilon} \end{aligned}$$

For the second term, we first integrate the deviations and we use Hoeffding's inequality to obtain

$$\begin{aligned}
\mathbb{E} \left[ e^{\frac{1}{3}t\widehat{\gamma}_{1,t}^2} \mathbf{1}_{\{|\widehat{\gamma}_{1,t}| \geq \frac{\varepsilon}{3}\}} \right] &\leq e^{\frac{1}{3}t(\frac{\varepsilon}{3})^2} \mathbb{P}(|\widehat{\gamma}_{1,t}| \geq \frac{\varepsilon}{3}) + \int_{e^{\frac{1}{3}t(\frac{\varepsilon}{3})^2}}^{+\infty} \mathbb{P}(e^{\frac{1}{3}t\widehat{\gamma}_{1,t}^2} \geq x) dx \\
&\leq 2e^{-\frac{1}{54}t\varepsilon^2} + \int_{e^{\frac{1}{27}t\varepsilon^2}}^{+\infty} \mathbb{P} \left( |\widehat{\gamma}_{1,t}| \geq \sqrt{\frac{3 \log x}{t}} \right) dx \\
&\leq 2e^{-\frac{1}{54}t\varepsilon^2} + 2 \int_{e^{\frac{1}{27}t\varepsilon^2}}^{+\infty} e^{-\frac{3}{2} \log x} dx \\
&\leq 6e^{-\frac{1}{54}t\varepsilon^2},
\end{aligned}$$

which yields

$$\begin{aligned}
\sum_{t=1}^{+\infty} \int_{-\infty}^{+\infty} e^{-\frac{1}{3}tv^2} dv \cdot \mathbb{E} \left[ e^{\frac{1}{3}t\widehat{\gamma}_{1,t}^2} \mathbf{1}_{\{|\widehat{\gamma}_{1,t}| \geq \frac{\varepsilon}{3}\}} \right] &\leq \int_{-\infty}^{+\infty} 6 \sum_{t=1}^{+\infty} e^{-\frac{1}{3}t(v^2 + \frac{1}{18}\varepsilon^2)} dv \\
&\leq \int_{-\infty}^{+\infty} 18 \frac{1}{v^2 + \frac{1}{18}\varepsilon^2} dv = \frac{54\sqrt{2}\pi}{\varepsilon}.
\end{aligned}$$

Putting together all the steps finishes the proof.
